# Supplementary material for: Association Between Time in Range and HbA1c in Japanese Patients With Type 2 Diabetes Mellitus
Source: Research Square preprint supplement (doi:10.21203/rs.3.rs-777755/v1), 2021-08-05
Supplement: Supplementary file 1 [file d8e14dc193f9fa226eb253b7.docx]

**Supplementary Table 1.** List of sites and investigators

| Site | Investigator(s) |
| --- | --- |
| Ashiya Central Hospital | Koji Matsushita, Manabu Narisawa |
| Aso Clinic | Katsumi Aso, Yuko Ando, Fumihiko Sato |
| Hagiwara Central Hospital | Emiko Morita, Keiichi Torimoto |
| Hayashi Clinic | Isao Hayashi |
| Inokuchi Clinic | Nobuo Inokuchi |
| Japan Community Health Care Organization Osaka Hospital | Masahiro Hatazaki, Arichika Deguchi, Azusa Shiraki |
| Juntendo Tokyo Koto Geriatric Medical Center (Department of Medicine, Diabetology and Endocrinology) | Ayako Kitamura, Eri Tanabe, Hidenori Yoshii, Tomio Onuma, Tomo Nakajima |
| Juntendo University Graduate School of Medicine (Department of Metabolism & Endocrinology) | Eisuke Yasunari, Hideyoshi Kaga, Hiroaki Sato, Hirotaka Watada, Kagemi Takeno, Luka Suzuki, Miwa Himuro, Syuhei Aoyama, Takashi Funayama, Takehiro Katahira, Takeshi Miyatsuka, Tomoya Mita, Yuya Nishida |
| Juntendo University Nerima Hospital (Department of Medicine, Diabetes and Endocrinology) | Koji Komiya |
| Kanda Naika Clinic | Satoshi Kawashima |
| Kansai Rosai Hospital (Diabetes and Endocrinology) | Tsunehiko Yamamoto |
| Kihara Diabetes Clinic | Yasuyuki Kihara |
| Kosugi Medical Clinic | Keisuke Kosugi |
| Kawasaki Hospital (Department of Internal Medicine) | Akihito Otsuka, Jun Murai |
| Matsuoka Medical Clinic | Hirofumi Matsuoka |
| Misaki Naika Clinic | Nobuichi Kuribayashi |
| Japan Labour Health and Safety Organization Kyushu Rosai Hospital, Moji Medical Center (Department of Internal Medicine) | Tadashi Arao, Kei Sugai |
| Musashino Family Clinic | Yuichi Kojima |
| Nakakinen Clinic | Maiko Nakata, Miyoko Saito, Takeshi Osonoi, Yusuke Osonoi |
| Nakama Municipal Hospital | Kohei Uriu, Yoshifumi Inada, Kanako Suzuka, Ichiro Takagi |
| National Hospital Organization Osaka National Hospital (Diabetes Center) | Ken Kato |
| Nishida Keiko Diabetes Clinic | Keiko Nishida, Akira Kurozumi, Fumi Uemura, Keiichi Torimoto, Maiko Hajime, Manabu Narisawa, Satomi Sonoda, Kumiko Tidiwa |
| Osaka General Medical Center (Department of Diabetes and Endocrinology) | Yohei Fujita, Sayoko Shimizu, Masahisa Hata, Yutaka Umayahara |
| Osaka Police Hospital (Department of Endocrinology and Metabolism) | Tetsuyuki Yasuda |
| Osaka Rosai Hospital | Kayoko Ryomoto |
| Osaka University Graduate School of Medicine (Department of Metabolic Medicine) | Iichiro Shimomura, Naoto Katakami, Takaaki Matsuoka, Mitsuyoshi Takahara, Kazuyuki Miyashita, Hiroyo Ninomiya, Naohiro Taya |
| Sasaki Hospital | Shinichiro Mine, Kenji Koikawa |
| School of Medicine, University of Occupational and Environmental Health, Japan (First Department of Internal Medicine) | Yosuke Okada, Akira Kurozumi, Manabu Narisawa, Maiko Hajime, Fumi Uemura, Satomi Sonoda, Kenichi Tanaka, Takashi Otsuka, Kenji Koikawa, Megumi Miyazaki, Akemi Tokutsu, Momoko Habu, Momo Saito, |
| Secomedic Hospital | Satomi Wakasugi, Tomoya Mita |
| Shiraiwa Medical Clinic | Toshihiko Shiraiwa |
| Taneda Clinic | Yoshinobu Taneda |
| Takaishi Naika Ichoka Clinic | Tomoya Mita |
| Tobata General Hospital (Department of Internal Medicine) | Kazuko Kanda |
| Wakamatsu Hospital of the University of Occupational and Environmental Health | Keiichi Torimoto, Kosuke Nishio |

Sites and investigators are listed in alphabetical order
